# Supplementary material for: Contemporary Status of Acute Myocardial Infarction in Korean Patients: Korean Registry of Acute Myocardial Infarction for Regional Cardiocerebrovascular Centers
Source: PubMed Central journal article supplement (PMC7867023; doi:10.3390/jcm10030498), 2021-02-01
Supplement: jcm-10-00498-s001.pdf [file jcm-10-00498-s001.pdf]

**Table S1.** Characteristics of the KRAMI-RCC patients by gender.

|                                                           | Female<br>(N = 3048) | Male<br>(N = 8652) | Total<br>(N = 11700) |
|-----------------------------------------------------------|----------------------|--------------------|----------------------|
| Type of AMI                                               |                      |                    |                      |
| NSTEMI                                                    | 1953 (64.1%)         | 4668 (54.0%)       | 6621 (56.6%)         |
| STEMI                                                     | 1095 (35.9%)         | 3984 (46.0%)       | 5079 (43.4%)         |
| Age (years), mean $\pm$ SD                                | 74.0 $\pm$ 11.0      | 63.0 $\pm$ 12.4    | 65.9 $\pm$ 13.0      |
| Type of health insurance                                  |                      |                    |                      |
| public insurance                                          | 2737 (89.9%)         | 8107 (93.8%)       | 10844 (92.7%)        |
| medical aid                                               | 288 (9.5%)           | 468 (5.4%)         | 756 (6.5%)           |
| individual insurance                                      | 20 (0.7%)            | 72 (0.8%)          | 92 (0.8%)            |
| Education level                                           |                      |                    |                      |
| elementary school                                         | 1585 (52.0%)         | 1337 (15.5%)       | 2922 (25.0%)         |
| middle school                                             | 426 (14.0%)          | 1207 (14.0%)       | 1633 (14.0%)         |
| high school                                               | 536 (17.6%)          | 3210 (37.1%)       | 3746 (32.0%)         |
| college                                                   | 159 (5.2%)           | 2108 (24.4%)       | 2267 (19.4%)         |
| graduate school                                           | 15 (0.5%)            | 314 (3.6%)         | 329 (2.8%)           |
| unknown                                                   | 325 (10.7%)          | 476 (5.5%)         | 801 (6.8%)           |
| Risk factors and Medical history                          |                      |                    |                      |
| Current smoking                                           | 111 (3.6%)           | 2355 (27.2%)       | 2466 (21.1%)         |
| High-risk alcohol useb                                    | 41 (21.2%)           | 1511 (40.7%)       | 1552 (39.7%)         |
| Hypertension                                              | 1979 (64.9%)         | 4003 (46.3%)       | 5982 (51.1%)         |
| Dyslipidemia                                              | 390 (12.8%)          | 1027 (11.9%)       | 1417 (12.1%)         |
| Diabetes Mellitus                                         | 1144 (37.5%)         | 2370 (27.4%)       | 3514 (30.0%)         |
| Previous PCI                                              | 433 (14.2%)          | 1181 (13.7%)       | 1614 (13.8%)         |
| Previous CABG                                             | 37 (1.2%)            | 72 (0.8%)          | 109 (0.9%)           |
| Previous dialysis                                         | 103 (3.4%)           | 194 (2.2%)         | 297 (2.5%)           |
| Any cancer                                                | 150 (4.9%)           | 470 (5.4%)         | 620 (5.3%)           |
| Symptom to first medical contact time (min), median (IQR) | 121.5 [49.0;324.0]   | 84.0 [34.0;230.0]  | 90.0 [37.0;248.0]    |
| Symptom to arrival time (min), median (IQR)               | 190.5 [86.0;425.0]   | 139.0 [61.0;311.5] | 153.0 [65.0;336.0]   |
| Symptom to arrival time                                   |                      |                    |                      |
| $\leq$ 60 min                                             | 399 (17.1%)          | 1807 (24.9%)       | 2206 (23.0%)         |
| 60 - 180 min                                              | 722 (30.9%)          | 2449 (33.7%)       | 3171 (33.0%)         |
| $>$ 180 min                                               | 1217 (52.1%)         | 3004 (41.4%)       | 4221 (44.0%)         |
| Door to device time at STEMI patients (min), median (IQR) | 56.0 [46.0;67.0]     | 54.0 [44.0;65.0]   | 55.0 [44.0;66.0]     |
| Type of transport to emergency room                       |                      |                    |                      |
| public ambulance                                          | 702 (23.0%)          | 2248 (26.0%)       | 2950 (25.2%)         |
| private ambulance                                         | 1308 (42.9%)         | 3117 (36.0%)       | 4425 (37.8%)         |
| cares or buses                                            | 1016 (33.3%)         | 3198 (37.0%)       | 4214 (36.0%)         |
| walking                                                   | 22 (0.7%)            | 89 (1.0%)          | 111 (0.9%)           |
| Transfer from other hospitals                             | 1651 (54.2%)         | 4349 (50.3%)       | 6000 (51.3%)         |

|                                                       |              |              |               |
|-------------------------------------------------------|--------------|--------------|---------------|
| Performed PCI                                         | 2650 (86.9%) | 7955 (91.9%) | 10605 (90.6%) |
| Number of significant stenotic artery                 |              |              |               |
| 1                                                     | 1524 (57.5%) | 4780 (60.1%) | 6304 (59.4%)  |
| 2                                                     | 766 (28.9%)  | 2253 (28.3%) | 3019 (28.5%)  |
| 3                                                     | 360 (13.6%)  | 922 (11.6%)  | 1282 (12.1%)  |
| Heart failure at arrival                              | 383 (12.6%)  | 659 (7.6%)   | 1042 (8.9%)   |
| Cardiogenic shock at arrival                          | 271 (8.9%)   | 647 (7.5%)   | 918 (7.8%)    |
| Cardiac arrest at hospital                            | 239 (7.8%)   | 512 (5.9%)   | 751 (6.4%)    |
| Stroke at hospital                                    | 29 (1.0%)    | 64 (0.7%)    | 93 (0.8%)     |
| Atrial fibrillation at hospital                       | 332 (10.9%)  | 634 (7.3%)   | 966 (8.3%)    |
| In-hospital death                                     | 242 (7.9%)   | 413 (4.8%)   | 655 (5.6%)    |
| All cause death from discharge during PH<br>3 months  | 81 (2.9%)    | 125 (1.5%)   | 206 (1.9%)    |
| All cause death from discharge during PH<br>12 months | 183 (6.6%)   | 301 (3.7%)   | 484 (4.4%)    |

---

NSTEMI: non-ST elevation myocardial infarction ; STEMI: ST elevation myocardial infarction; SD: standard deviation; IQR: Interquartile range; PCI: percutaneous coronary intervention; CABG: coronary artery bypass graft; PH: post-hospital
